# Supplementary material
Source: Springer Nature journal article supplement (https://www.springermedizin.de/resource/supplementary/13054_2010_9315_MOESM5_ESM.pdf/9705932)

**A** overall survival: admission + day 3 + day 7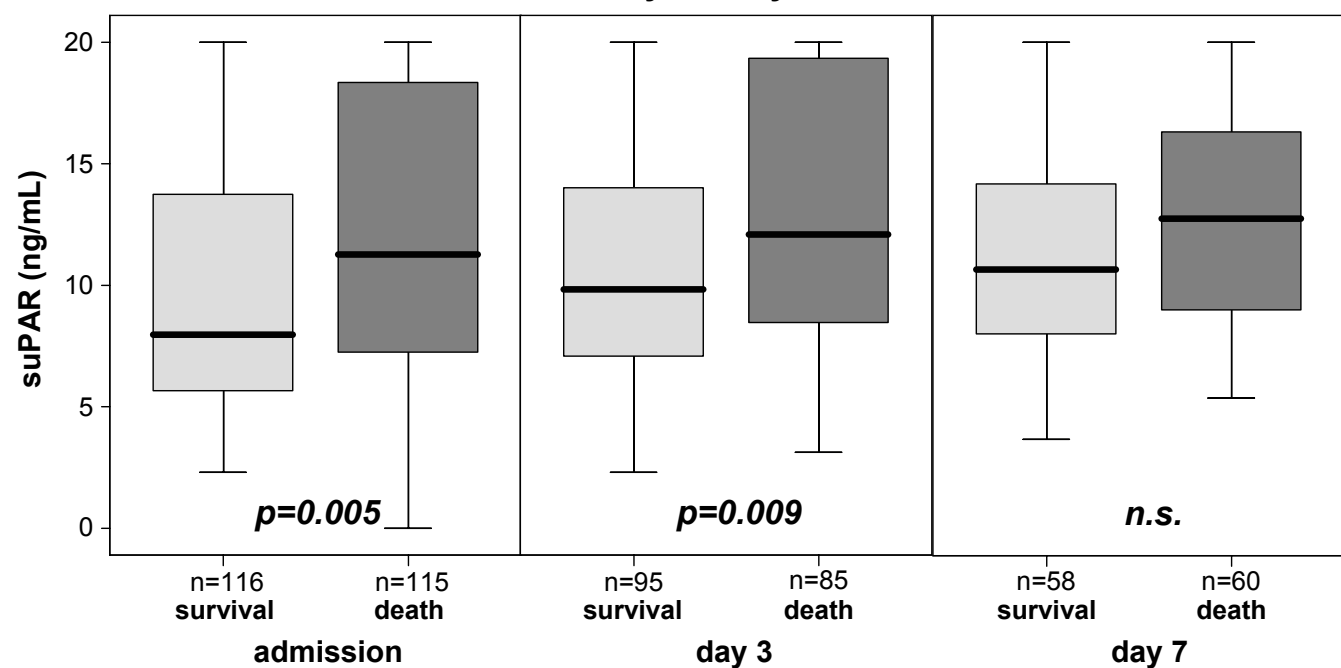**B** overall survival: admission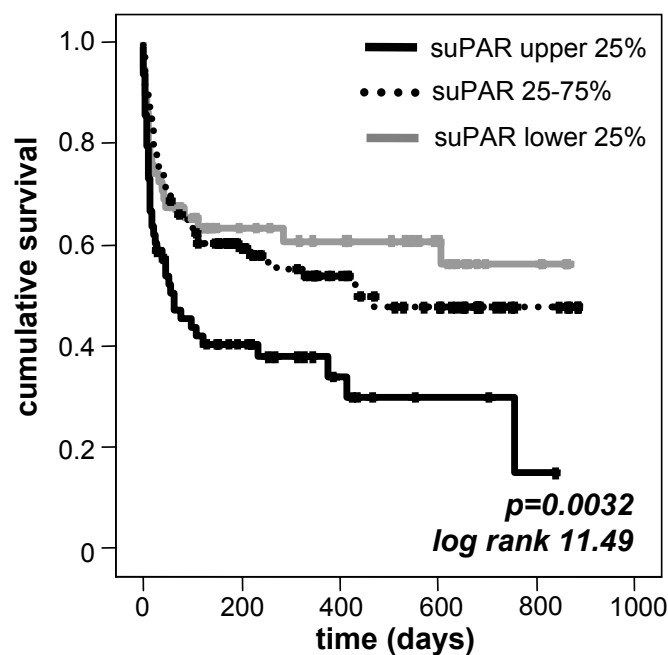**C** overall survival: day 3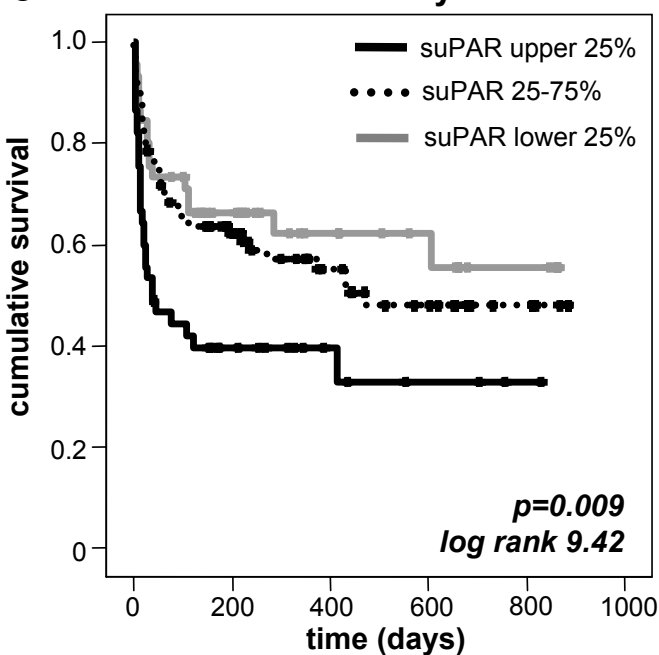**D** overall survival: admission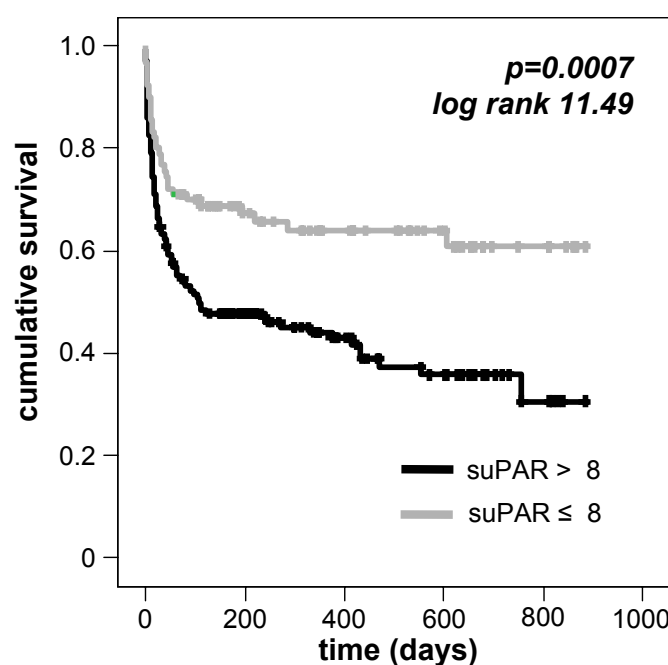**E** overall survival: day 3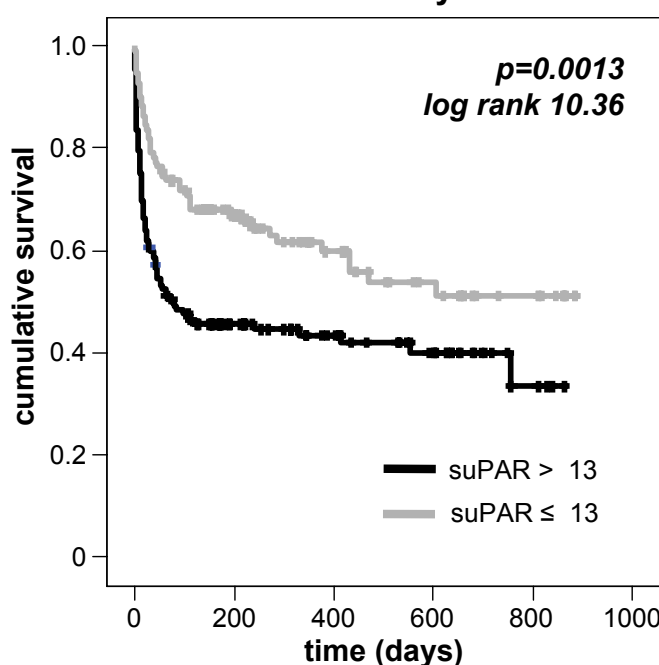

Supplement: MOESM5 [file 9705932]
